# Supplementary material for: IPB-MSA&SO 4 : a daily 0.25° resolution dataset of in situ-produced biogenic methanesulfonic acid and sulfate over the North Atlantic during 1998–2022 based on machine learning
Source: Copernicus journal article supplement (doi:10.5194/essd-16-2717-2024), 2024-06-12
Supplement: Supplementary file 1 [file essd-16-2717-2024-supplement.pdf]

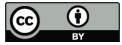

*Supplement of*

**IPB-MSA&SO<sub>4</sub>: a daily 0.25° resolution dataset of in situ-produced biogenic methanesulfonic acid and sulfate over the North Atlantic during 1998–2022 based on machine learning**

**Karam Mansour et al.**

*Correspondence to:* Karam Mansour (k.mansour@isac.cnr.it) and Matteo Rinaldi (m.rinaldi@isac.cnr.it)

The copyright of individual parts of the supplement might differ from the article licence.

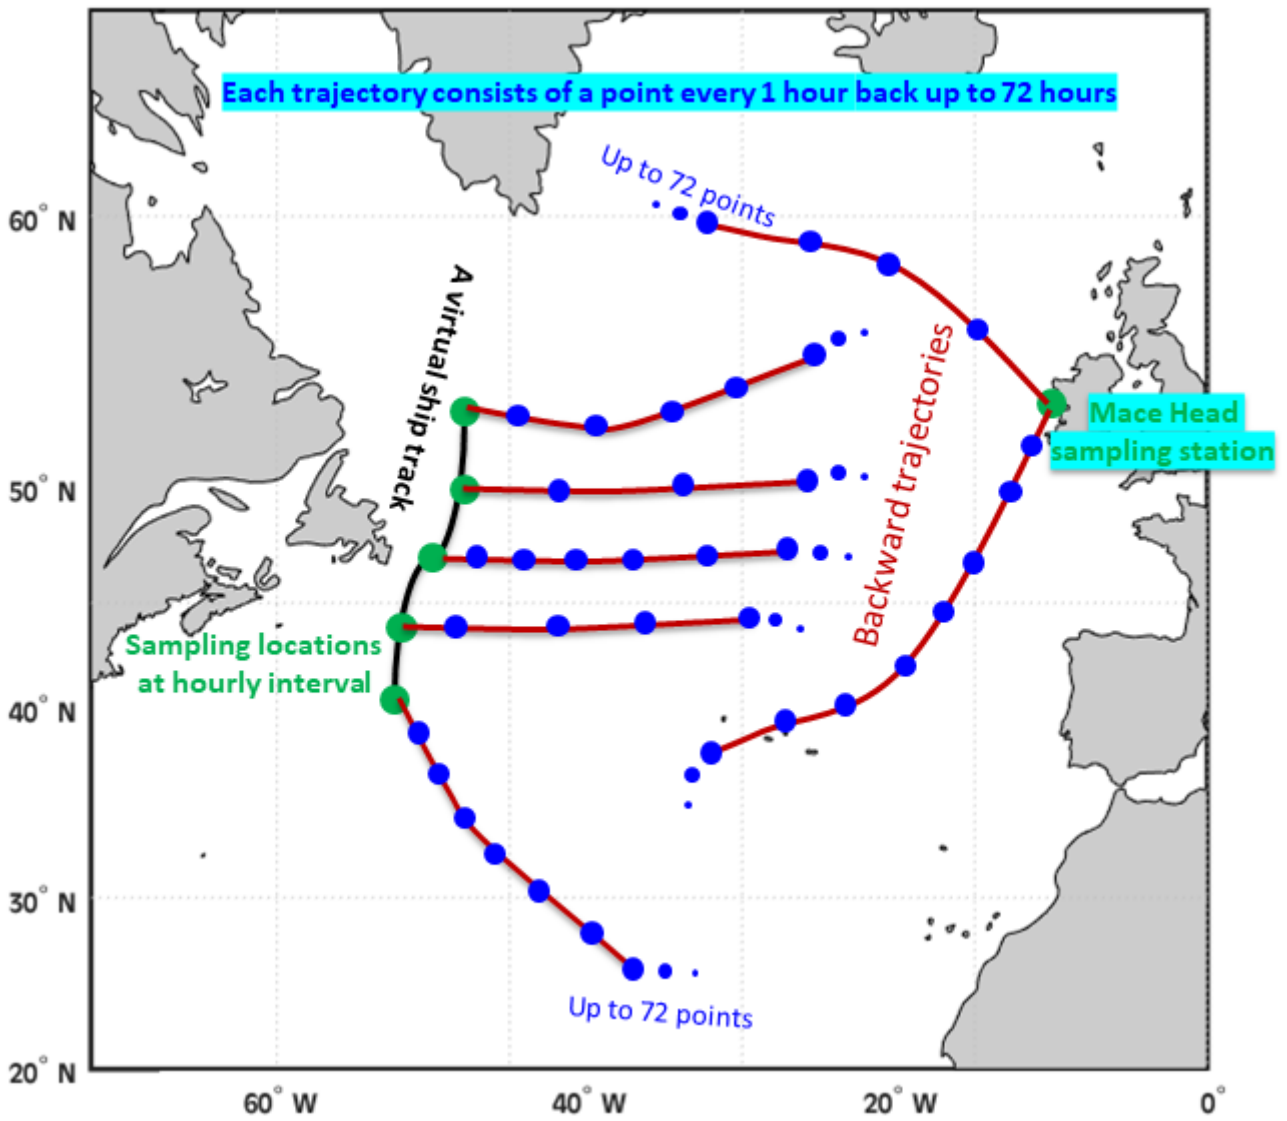

Figure S1: Schematic diagram of the air mass back-trajectories calculated at Mace Head and for NAAMES cruises (a virtual cruise track is represented by the black line). Each trajectory consists of 73 points (green as a start and blue points are backward hours). The predictors have been extracted along each track to consider the air mass history.

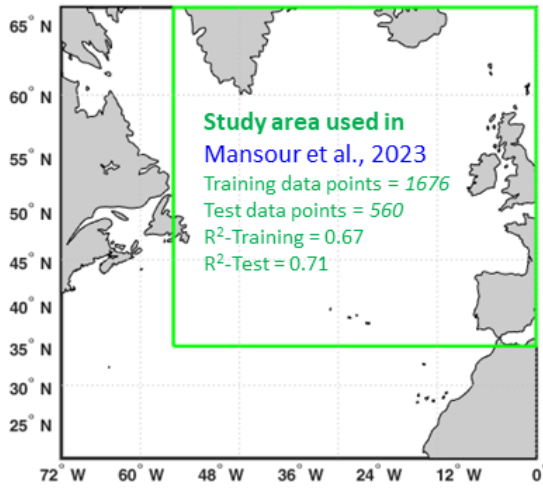

**Predictors of seawater DMS are:**

- Chlorophyl-a (CHL)
- Sea surface temperature (SST)
- Mixed layer depth (MLD)
- Photosynthetically active radiation (PAR)
- Sea surface nitrate (NO<sub>3</sub>)

**Extended North Atlantic domain**

Training data points = 2571 ( $R^2 = 0.74$ )

Test data points = 856 ( $R^2 = 0.77$ )

**Predictors of seawater DMS in the extended domain, based on ANOVA analysis of the multilinear regression, are:**

- Chlorophyl-a (CHL)
- Sea surface temperature (SST)
- Mixed layer depth (MLD)
- Photosynthetically active radiation (PAR)
- Sea surface nitrate (NO<sub>3</sub>)
- Sea surface salinity (SSS)
- Sea surface silicate (Si)

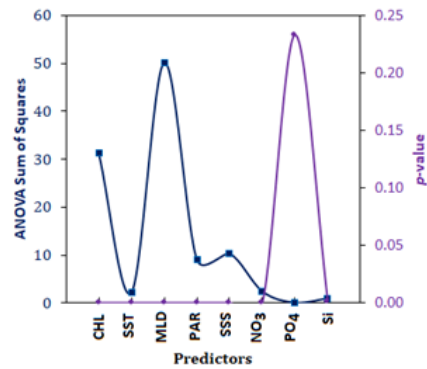

The ANOVA show no statistically significant ( $p < 0.05$ ) contribution from PO<sub>4</sub>. For this reason, we applied the GPR model (Mansour et al., 2023) using the 7 predictors in the extended domain.

**Figure S2: The main differences between the North Atlantic domain used in the present study and the domain used in Mansour et al. 2023 (green box areas).**

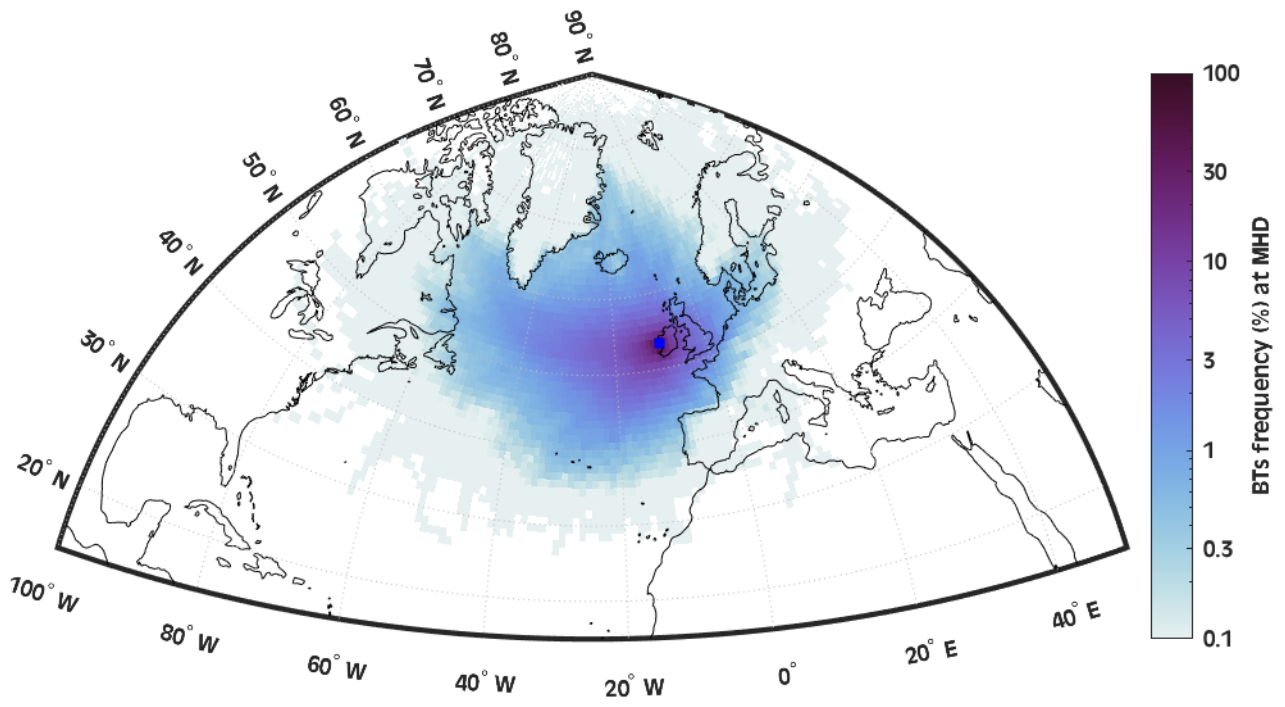

Figure S3: Spatial distributions of the BTs endpoints arriving at Mace Head from Jan 2009 to Jun 2018, displaying where the majority of endpoints are located. The total number of trajectory endpoints was counted in each 1°×1° grid cell and normalized to the maximum value as a percentage.

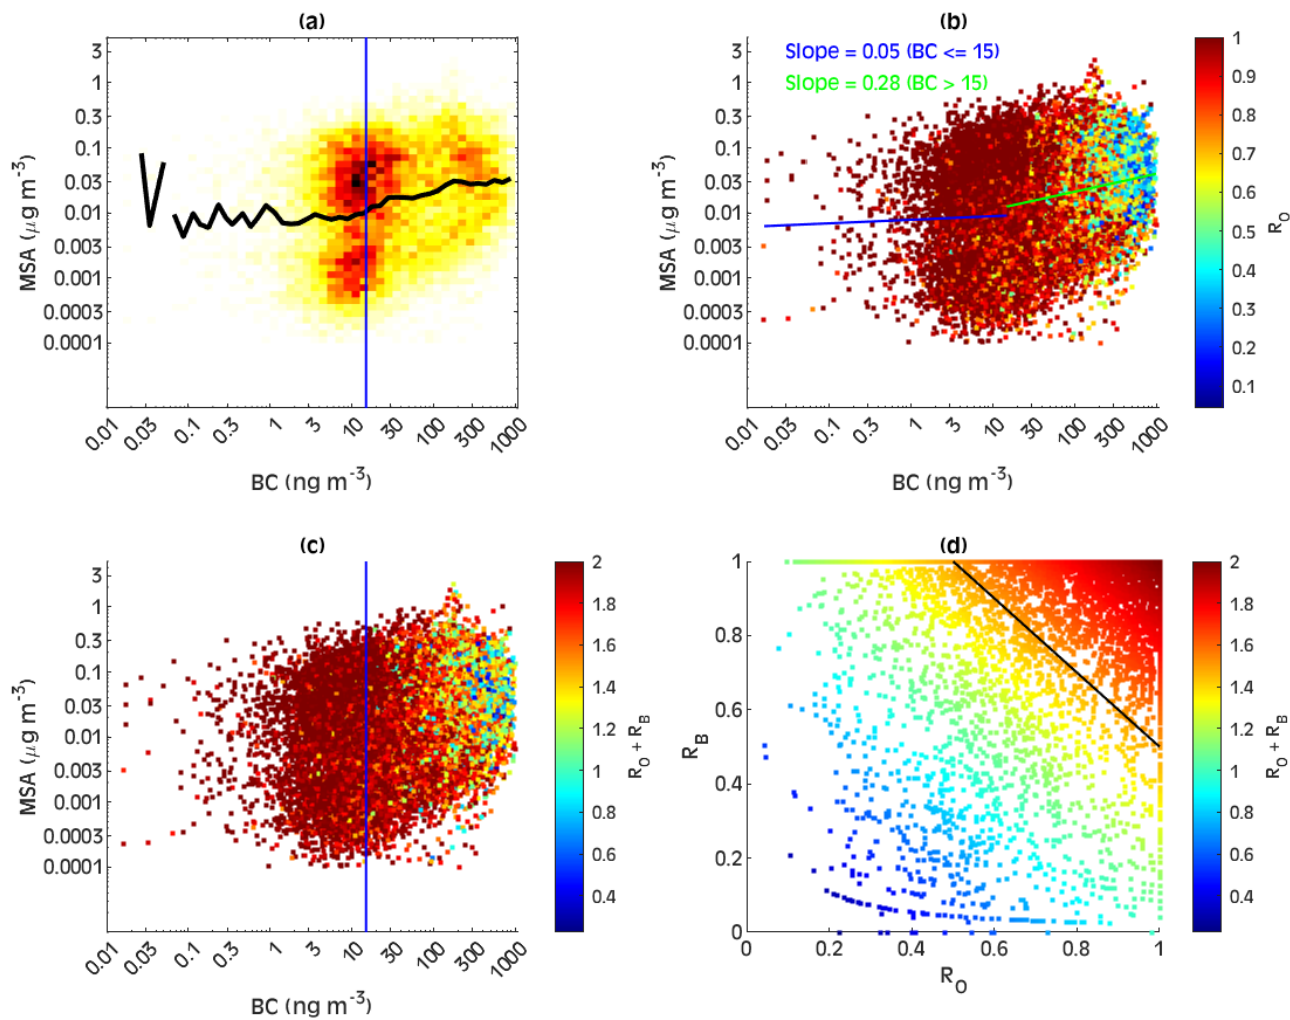

**Figure S4: (a) Joint probability histograms of BC-MSA at MHD where darker colors indicate higher probability; the thick black line shows the mean MSA at each BC bin, illustrating MSA behavior as BC changes. The vertical blue line represents the BC value of  $15 \text{ ng m}^{-3}$ . (b) Scatter plot between MSA and BC where the color scale represents the  $R_o$  values. (c) Scatter plot between MSA and BC where the color scale represents the  $R_o + R_B$  values. (d) Scatter plot between  $R_o$  and  $R_o$  where the color scale represents the sum of them; the points above the diagonal black line have been selected as representative of marine conditions.**

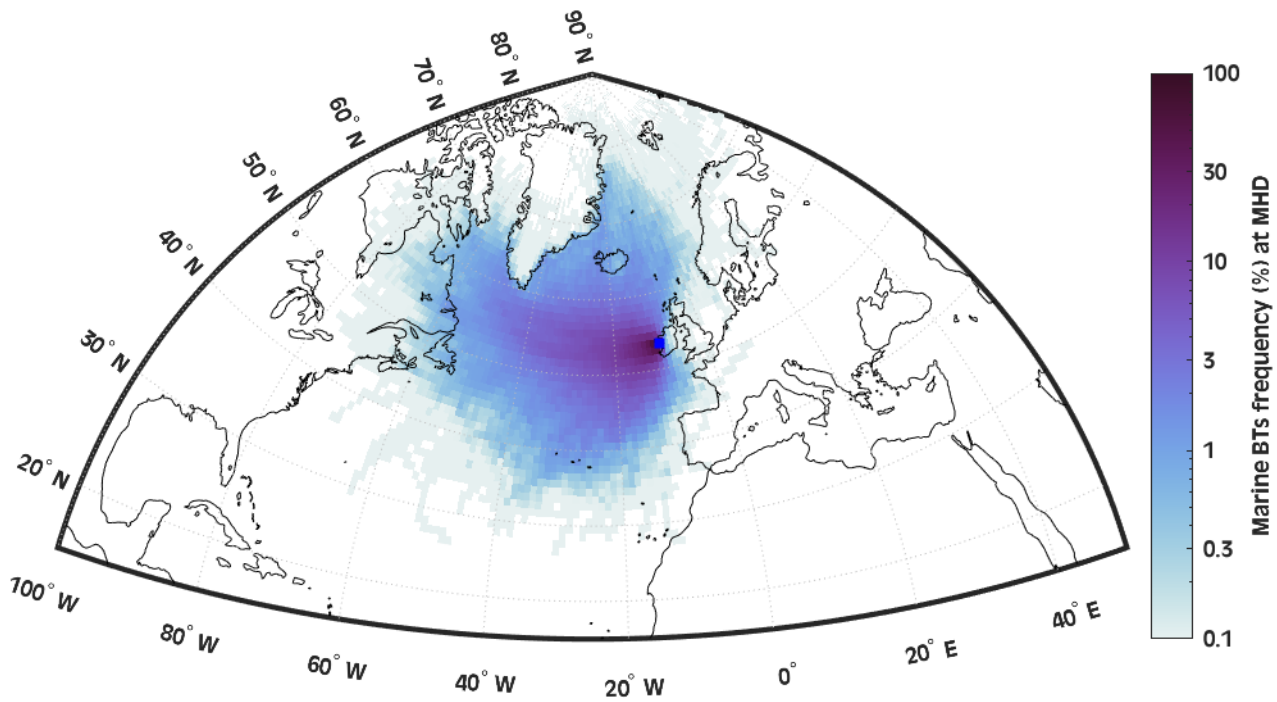

Figure S5: Spatial distributions of the selected marine BTs endpoints arriving at Mace Head from Jan 2009 to Jun 2018, displaying where the majority of endpoints are located. The total number of trajectory endpoints was counted in each 1°×1° grid cell and normalized to the maximum value as a percentage.

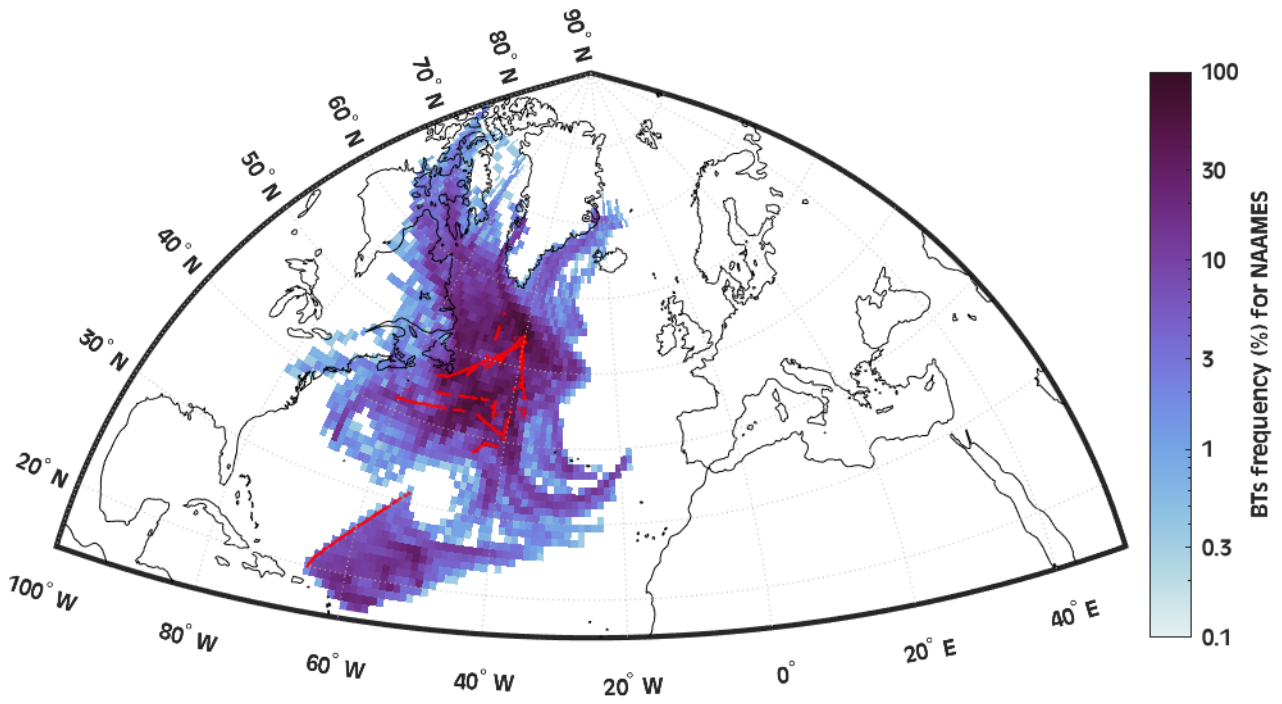

Figure S6: Spatial distributions of the BTs endpoints arriving at NAAMES cruises, displaying where the majority of endpoints are located. The total number of trajectory endpoints was counted in each  $1^{\circ} \times 1^{\circ}$  grid cell and normalized to the maximum value as a percentage.

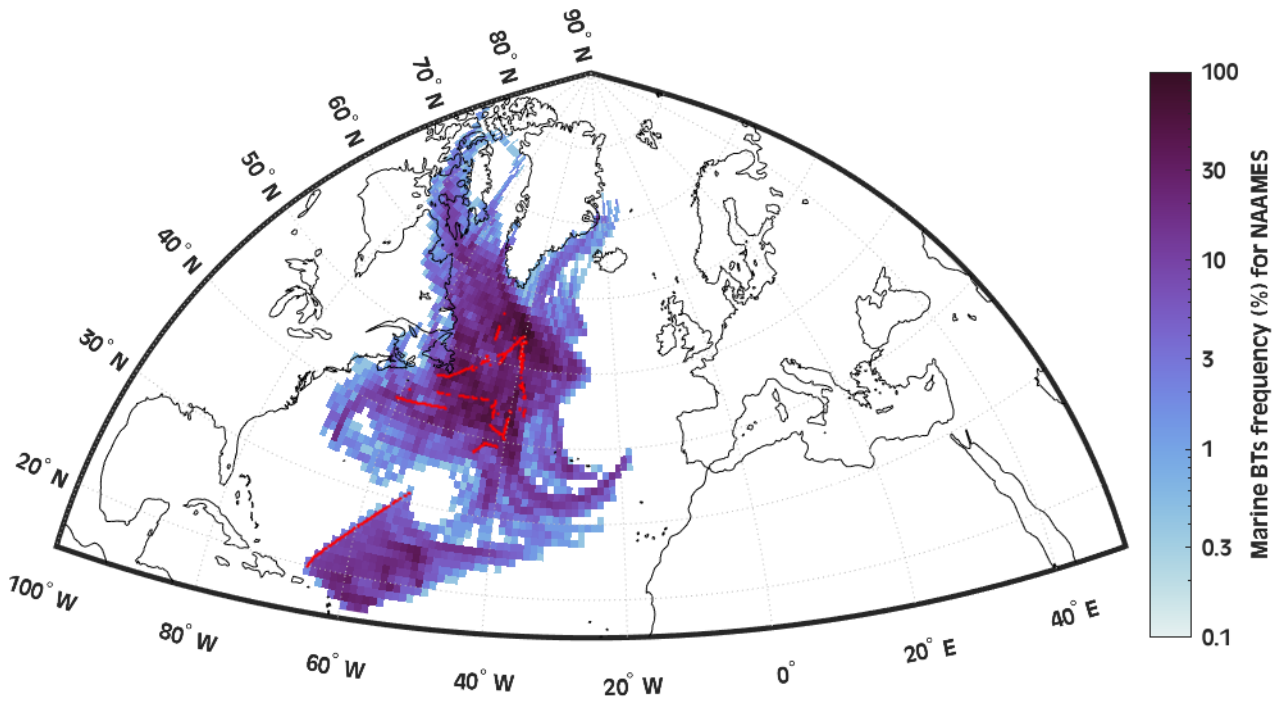

Figure S7: Spatial distributions of the marine BTs endpoints arriving at NAAMES cruises, displaying where the majority of endpoints are located. The total number of trajectory endpoints was counted in each  $1^{\circ}\times 1^{\circ}$  grid cell and normalized to the maximum value as a percentage.



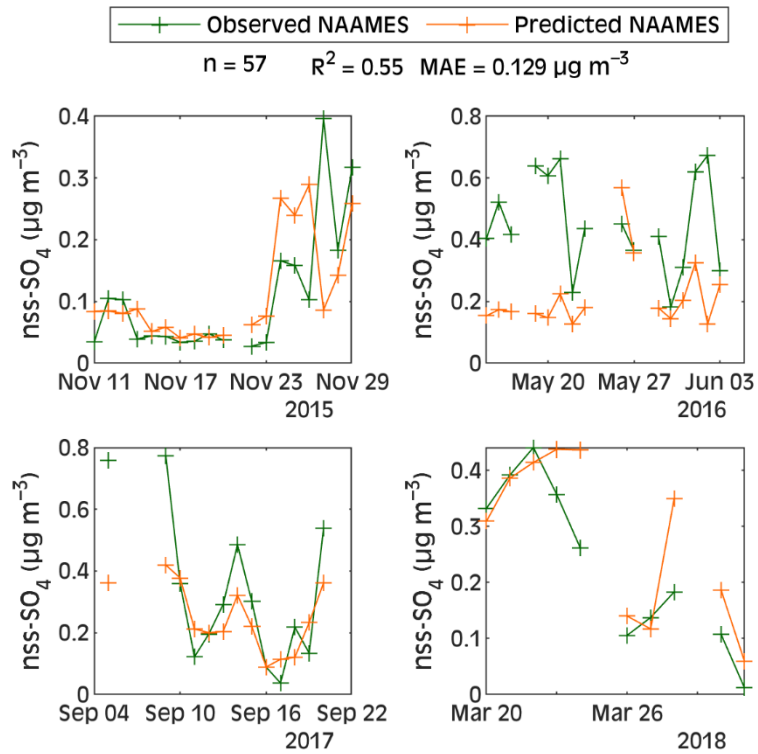

**Figure S8: Comparison between daily observed and GPR-predicted  $nss\text{-SO}_4^-$  during the four NAAMES campaigns. The GPR was trained on the MHD data and tested on the NAAMES data.  $R^2$  is computed in a logarithmic space, whereas MAE is computed on a normal scale.**

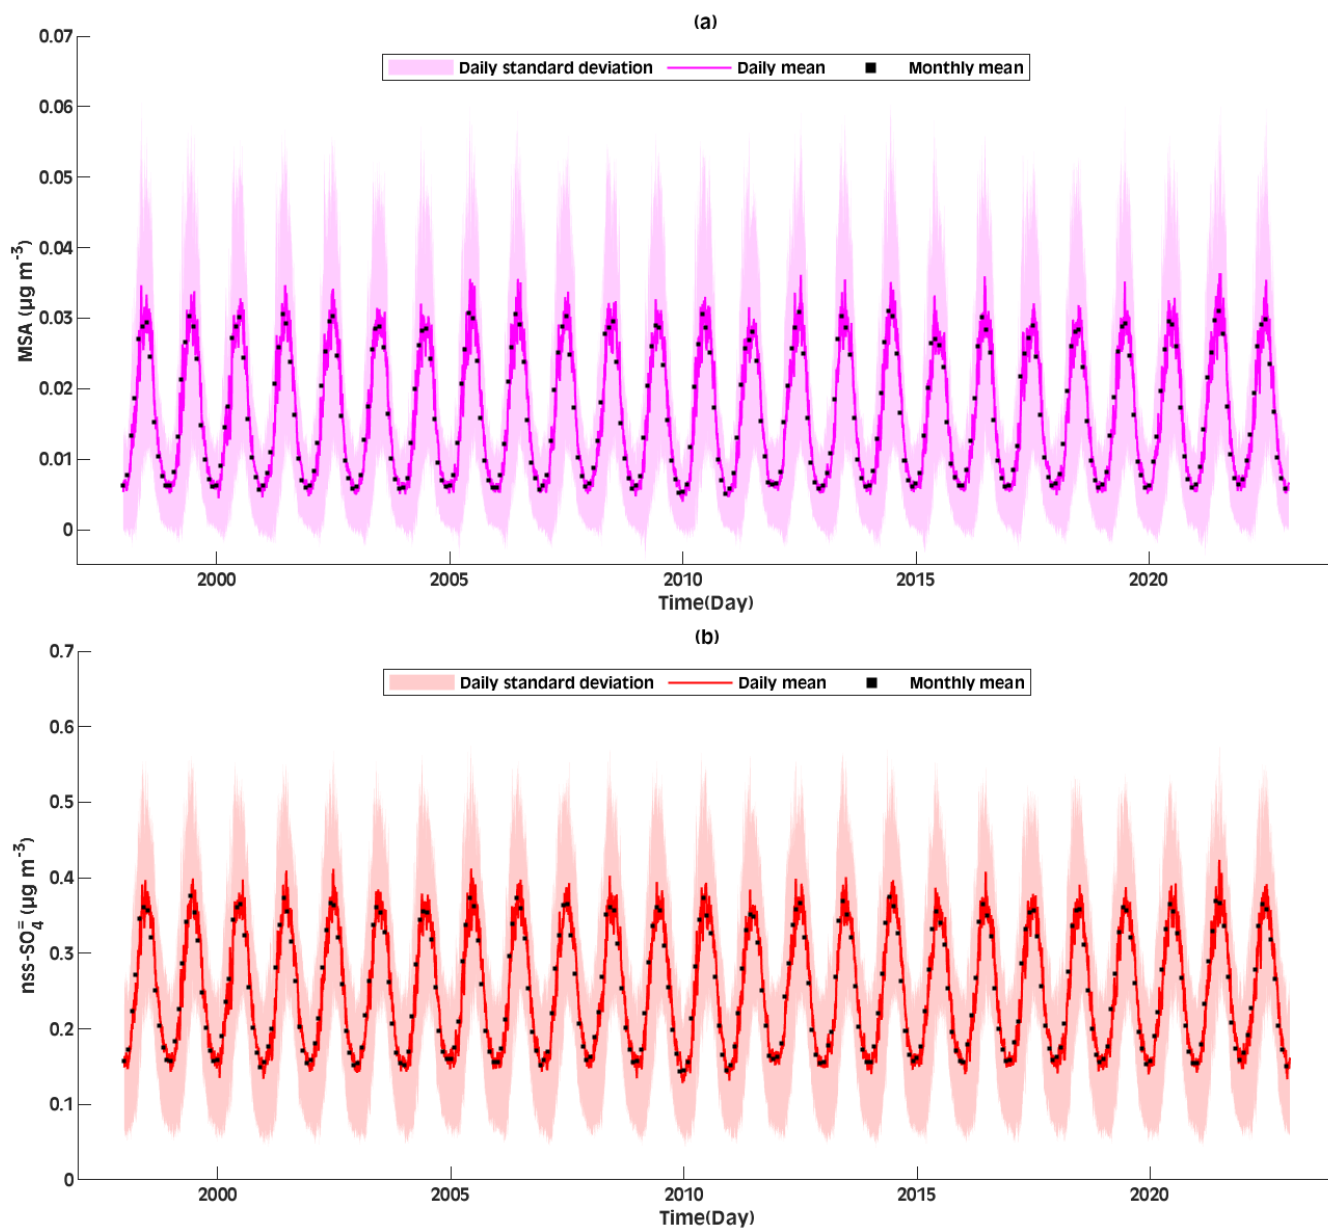

**Figure S9: Daily time series of (a) MSA and (b) nss-SO<sub>4</sub><sup>-</sup> over the entire NA domain obtained by GPR in 1998–2022. The shaded area displays  $\pm 1$  spatial standard deviation and the black dots represent the monthly mean.**

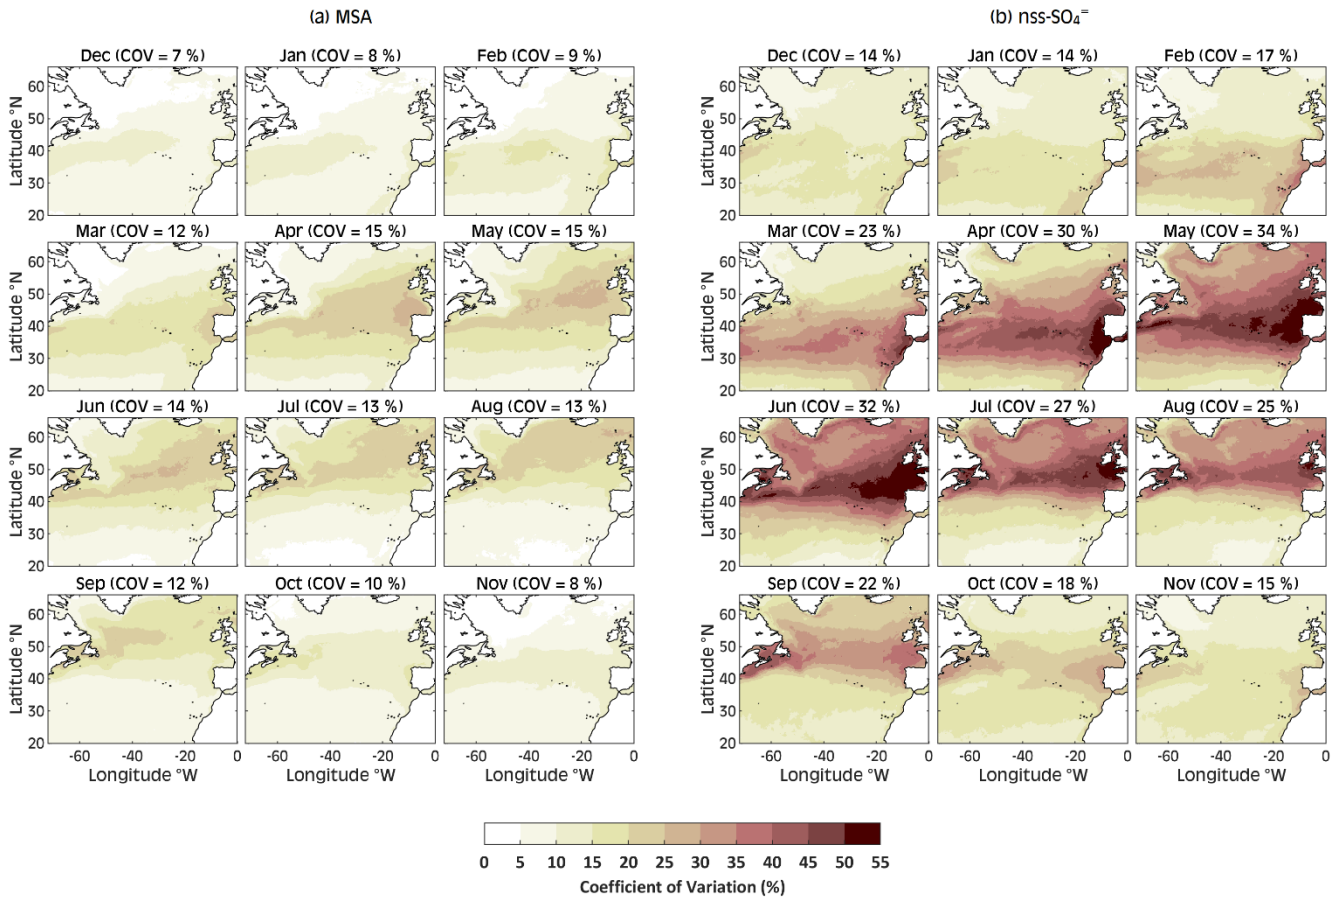

Figure S10: Spatial distribution of the monthly coefficient of variation (COV) for (a) MSA and (b)  $\text{nss-SO}_4^-$  over the entire NA domain in 1998–2022. The COV for each grid point is calculated as the ratio between the standard deviation and the mean value, expressed in percentage (on log-transformed data), to evaluate the monthly stability of MSA and  $\text{nss-SO}_4^-$ . Higher COV indicates lower compound stability (many more variants).

|                             |                     | MSA              |                |       |                | nss-SO <sub>4</sub> <sup>=</sup> |                |       |                |
|-----------------------------|---------------------|------------------|----------------|-------|----------------|----------------------------------|----------------|-------|----------------|
| Model Type                  | Preset              | Cross-validation |                | Test  |                | Cross-validation                 |                | Test  |                |
|                             |                     | RMSE             | R <sup>2</sup> | RMSE  | R <sup>2</sup> | RMSE                             | R <sup>2</sup> | RMSE  | R <sup>2</sup> |
| Multilinear                 | Linear              | 0.408            | 0.74           | 0.392 | 0.76           | 0.324                            | 0.53           | 0.318 | 0.55           |
| Support Vector Machines     | Linear              | 0.409            | 0.74           | 0.393 | 0.76           | 0.325                            | 0.53           | 0.319 | 0.54           |
|                             | Quadratic           | 0.398            | 0.75           | 0.384 | 0.77           | 0.318                            | 0.55           | 0.310 | 0.57           |
|                             | Cubic               | 0.390            | 0.76           | 0.376 | 0.78           | 0.311                            | 0.57           | 0.304 | 0.59           |
|                             | Fine Gaussian       | 0.410            | 0.74           | 0.399 | 0.75           | 0.299                            | 0.60           | 0.293 | 0.61           |
|                             | Medium Gaussian     | 0.382            | 0.77           | 0.370 | 0.79           | 0.305                            | 0.58           | 0.296 | 0.61           |
|                             | Coarse Gaussian     | 0.395            | 0.76           | 0.380 | 0.78           | 0.315                            | 0.56           | 0.310 | 0.57           |
| Decision Tree               | Fine                | 0.457            | 0.67           | 0.457 | 0.67           | 0.357                            | 0.43           | 0.355 | 0.43           |
|                             | Medium              | 0.425            | 0.72           | 0.409 | 0.74           | 0.332                            | 0.51           | 0.315 | 0.55           |
|                             | Coarse              | 0.414            | 0.73           | 0.395 | 0.76           | 0.321                            | 0.54           | 0.309 | 0.57           |
| Regression Ensemble         | Boosted             | 0.399            | 0.75           | 0.386 | 0.77           | 0.309                            | 0.57           | 0.303 | 0.59           |
|                             | Bagged              | 0.374            | 0.78           | 0.360 | 0.80           | 0.297                            | 0.60           | 0.283 | 0.64           |
| Gaussian Process Regression | Squared Exponential | 0.383            | 0.77           | 0.370 | 0.79           | 0.305                            | 0.58           | 0.299 | 0.60           |
|                             | Matern 5/2          | 0.377            | 0.78           | 0.364 | 0.79           | 0.303                            | 0.59           | 0.295 | 0.61           |
|                             | Exponential         | 0.366            | 0.79           | 0.350 | 0.81           | 0.290                            | 0.62           | 0.280 | 0.65           |
|                             | Rational Quadratic  | 0.362            | 0.79           | 0.347 | 0.81           | 0.282                            | 0.64           | 0.272 | 0.67           |
| Neural Networks             | Narrow              | 0.388            | 0.76           | 0.374 | 0.78           | 0.311                            | 0.57           | 0.301 | 0.59           |
|                             | Medium              | 0.387            | 0.77           | 0.379 | 0.78           | 0.311                            | 0.57           | 0.300 | 0.60           |
|                             | Wide                | 0.410            | 0.74           | 0.390 | 0.76           | 0.322                            | 0.53           | 0.304 | 0.59           |
|                             | Bi-layered          | 0.389            | 0.76           | 0.378 | 0.78           | 0.313                            | 0.56           | 0.301 | 0.59           |
|                             | Tri-layered         | 0.386            | 0.77           | 0.373 | 0.78           | 0.314                            | 0.56           | 0.307 | 0.58           |

Table S1: Evaluation metrics for cross/validation and test datasets of the applied machine learning models and the multilinear model trained to estimate MSA and nss-SO<sub>4</sub><sup>=</sup> concentrations. Shaded cells represent the best performance from each type.

|               |            | MSA                 |        |                | nss-SO <sub>4</sub> <sup>-</sup> |        |                | MSA: nss-SO <sub>4</sub> <sup>-</sup> |        |                |
|---------------|------------|---------------------|--------|----------------|----------------------------------|--------|----------------|---------------------------------------|--------|----------------|
|               |            | Mean<br>±<br>SD     | Median | P10<br>P90     | Mean<br>±<br>SD                  | Median | P10<br>P90     | Mean<br>±<br>SD                       | Median | P10<br>P90     |
| <b>Annual</b> |            | 0.016<br>±<br>0.007 | 0.017  | 0.007<br>0.023 | 0.250<br>±<br>0.077              | 0.256  | 0.144<br>0.341 | 0.053<br>±<br>0.012                   | 0.054  | 0.034<br>0.063 |
| <b>Winter</b> | <b>Dec</b> | 0.006<br>±<br>0.005 | 0.004  | 0.001<br>0.014 | 0.155<br>±<br>0.079              | 0.138  | 0.066<br>0.273 | 0.032<br>±<br>0.012                   | 0.028  | 0.018<br>0.050 |
|               | <b>Jan</b> | 0.006<br>±<br>0.006 | 0.004  | 0.001<br>0.015 | 0.158<br>±<br>0.086              | 0.131  | 0.064<br>0.288 | 0.032<br>±<br>0.013                   | 0.026  | 0.019<br>0.052 |
|               | <b>Feb</b> | 0.008<br>±<br>0.008 | 0.005  | 0.001<br>0.019 | 0.178<br>±<br>0.101              | 0.140  | 0.067<br>0.319 | 0.036<br>±<br>0.015                   | 0.031  | 0.021<br>0.057 |
| <b>Spring</b> | <b>Mar</b> | 0.013<br>±<br>0.010 | 0.011  | 0.002<br>0.023 | 0.219<br>±<br>0.117              | 0.193  | 0.080<br>0.367 | 0.046<br>±<br>0.018                   | 0.047  | 0.026<br>0.065 |
|               | <b>Apr</b> | 0.020<br>±<br>0.012 | 0.023  | 0.003<br>0.032 | 0.279<br>±<br>0.120              | 0.291  | 0.115<br>0.417 | 0.059<br>±<br>0.020                   | 0.067  | 0.029<br>0.078 |
|               | <b>May</b> | 0.026<br>±<br>0.014 | 0.028  | 0.006<br>0.042 | 0.337<br>±<br>0.102              | 0.355  | 0.194<br>0.470 | 0.068<br>±<br>0.022                   | 0.075  | 0.030<br>0.094 |
| <b>Summer</b> | <b>Jun</b> | 0.029<br>±<br>0.013 | 0.028  | 0.010<br>0.046 | 0.364<br>±<br>0.075              | 0.358  | 0.280<br>0.474 | 0.074<br>±<br>0.023                   | 0.075  | 0.035<br>0.102 |
|               | <b>Jul</b> | 0.029<br>±<br>0.011 | 0.028  | 0.017<br>0.044 | 0.357<br>±<br>0.060              | 0.352  | 0.293<br>0.442 | 0.077<br>±<br>0.022                   | 0.074  | 0.054<br>0.108 |
|               | <b>Aug</b> | 0.025<br>±<br>0.008 | 0.024  | 0.015<br>0.035 | 0.320<br>±<br>0.059              | 0.323  | 0.248<br>0.395 | 0.072<br>±<br>0.018                   | 0.069  | 0.055<br>0.096 |
| <b>Autumn</b> | <b>Sep</b> | 0.016<br>±<br>0.007 | 0.017  | 0.006<br>0.024 | 0.259<br>±<br>0.080              | 0.286  | 0.128<br>0.346 | 0.056<br>±<br>0.012                   | 0.058  | 0.038<br>0.070 |
|               | <b>Oct</b> | 0.010<br>±<br>0.006 | 0.010  | 0.002<br>0.017 | 0.201<br>±<br>0.086              | 0.219  | 0.078<br>0.301 | 0.042<br>±<br>0.014                   | 0.044  | 0.022<br>0.057 |
|               | <b>Nov</b> | 0.007<br>±<br>0.006 | 0.006  | 0.001<br>0.015 | 0.170<br>±<br>0.084              | 0.175  | 0.066<br>0.280 | 0.035<br>±<br>0.014                   | 0.034  | 0.019<br>0.053 |

Table S2. Statistics of the annual and monthly climatology (1998-2022) of MSA, nss-SO<sub>4</sub><sup>-</sup> and MSA:nss-SO<sub>4</sub><sup>-</sup> (the maps shown in Fig.8 and Fig.9 (Main Text)). SD stands for spatial standard deviation. P10 and P90 represent the 10 and 90 percentiles, respectively.
